# Supplementary material
Source: PubMed Central journal article supplement (PMC2876308)
Supplement: NIHMS200905-supplement-01.pdf [file NIHMS200905-supplement-01.pdf]

**Supplementary Table 1.** Correlation between CANTAB scores, telomere length and various potential confounders.

|                                      |         | DMS                        | PAL                         | PRM                        | RTI                        | SSP                         | SWM                         | LTL                         |
|--------------------------------------|---------|----------------------------|-----------------------------|----------------------------|----------------------------|-----------------------------|-----------------------------|-----------------------------|
| age                                  | r       | -0.20                      | 0.34                        | -0.24                      | 0.21                       | -0.35                       | 0.44                        | 0.35                        |
|                                      | p-value | <b>3 x 10<sup>-4</sup></b> | <b>2 x 10<sup>-11</sup></b> | <b>8 x 10<sup>-6</sup></b> | <b>2 x 10<sup>-4</sup></b> | <b>2 x 10<sup>-12</sup></b> | <b>3 x 10<sup>-19</sup></b> | <b>4 x 10<sup>-11</sup></b> |
| NART <sup>(1)</sup>                  | r       | +0.20                      | -0.18                       | +0.22                      | -0.06                      | +0.17                       | -0.73                       | 0.04                        |
| (age adjusted)                       | p-value | <b>3 x 10<sup>-4</sup></b> | <b>8 x 10<sup>-4</sup></b>  | <b>3 x 10<sup>-5</sup></b> | n.s.                       | <b>0.001</b>                | <b>5 x 10<sup>-7</sup></b>  | 0.486                       |
| BMI <sup>(1)</sup>                   | r       | 0.03                       | 0.05                        | -0.06                      | 0.02                       | -0.03                       | -0.01                       | -0.04                       |
|                                      | p-value | 0.600                      | 0.319                       | 0.290                      | 0.710                      | 0.580                       | 0.880                       | 0.390                       |
| vitamin D <sup>(1)</sup>             | r       | -0.04                      | -0.06                       | 0.03                       | -0.10                      | 0.02                        | 0.04                        | 0.04                        |
|                                      | p-value | 0.421                      | 0.212                       | 0.599                      | 0.066                      | 0.641                       | 0.437                       | 0.506                       |
| Homocysteine <sup>(1)</sup>          | r       | -0.04                      | -0.03                       | 0.00                       | 0.03                       | -0.01                       | 0.02                        | -0.16                       |
|                                      | p-value | 0.304                      | 0.440                       | 0.997                      | 0.459                      | 0.873                       | 0.666                       | <b>0.002</b>                |
| Exercise <sup>(1)</sup>              | r       | -0.04                      | -0.04                       | 0.00                       | -0.02                      | 0.06                        | 0.02                        | 0.23                        |
|                                      | p-value | 0.570                      | 0.600                       | 0.990                      | 0.797                      | 0.397                       | 0.829                       | <b>0.002</b>                |
| SES <sup>(1)</sup>                   | r       | -0.08                      | 0.08                        | -0.10                      | -0.01                      | -0.06                       | 0.09                        | -0.04                       |
|                                      | p-value | <b>0.034</b>               | <b>0.027</b>                | <b>0.005</b>               | 0.840                      | 0.140                       | <b>0.012</b>                | 0.487                       |
| smoking <sup>(1)</sup>               | r       | -0.02                      | 0.02                        | 0.02                       | 0.05                       | -0.11                       | 0.12                        | -0.18                       |
|                                      | p-value | 0.686                      | 0.640                       | 0.660                      | 0.400                      | <b>0.026</b>                | <b>0.014</b>                | 0.080                       |
| finished<br>Education <sup>(2)</sup> | r       | 0.16                       | -0.06                       | 0.02                       | -0.05                      | 0.09                        | -0.04                       | -0.03                       |
|                                      | p-value | <b>0.014</b>               | 0.400                       | 0.709                      | 0.458                      | 0.170                       | 0.277                       | 0.707                       |
| Diastolic<br>BP <sup>(1)</sup>       | r       | 0.01                       | 0.01                        | 0.02                       | 0.06                       | -0.02                       | -0.06                       | -0.02                       |
|                                      | p-value | 0.767                      | 0.998                       | 0.689                      | 0.169                      | 0.694                       | 0.096                       | 0.790                       |
| Serum<br>Glucose <sup>(1)</sup>      | r       | -0.03                      | -0.02                       | -0.07                      | 0.00                       | 0.05                        | -0.07                       | -0.06                       |
|                                      | p-value | 0.580                      | 0.760                       | 0.310                      | 0.990                      | 0.380                       | 0.290                       | 0.284                       |

(1) age adjusted

(2) age and NART adjusted
